# Supplementary material
Source: Springer Nature journal article supplement (https://www.springermedizin.de/resource/supplementary/12955_2008_543_MOESM1_ESM.pdf/9560668)

# SF-36 mean score, first visit

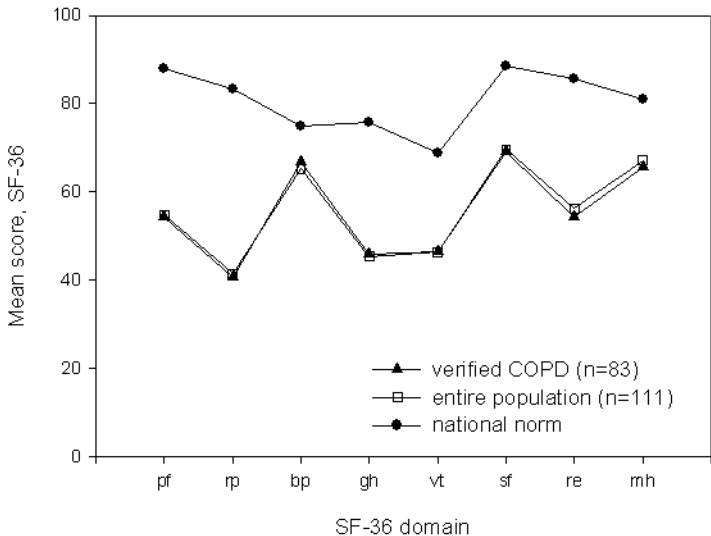

Supplement: MOESM1 [file 9560668]
